# Supplementary material for: Results of a large-scale randomized behavior change intervention on road safety in Kenya
Source: HighWire-hosted journal article supplement (doi:10.1073/pnas.1422009112), 2015-08-10
Supplement: pnas.201422009SI.pdf [file pnas.201422009SI.pdf]

# Supporting Information

Habyarimana and Jack 10.1073/pnas.1422009112

**Table S1. Balance test: Individual vs. collective action**

| Indicator                           | Control          | Placebo          | Individual action | Collective action | Joint orthogonality ( <i>P</i> value) |
|-------------------------------------|------------------|------------------|-------------------|-------------------|---------------------------------------|
| <b>Vehicle attributes</b>           |                  |                  |                   |                   |                                       |
| Share with license KA...*           | 0.583<br>(0.011) | 0.567<br>(0.012) | 0.561<br>(0.008)  | 0.572<br>(0.008)  | 0.378                                 |
|                                     |                  | [0.300]          | [0.089]           | [0.403]           |                                       |
| Share with license KB...            | 0.416<br>(0.011) | 0.433<br>(0.012) | 0.438<br>(0.008)  | 0.427<br>(0.008)  | 0.409                                 |
|                                     |                  | [0.303]          | [0.100]           | [0.415]           |                                       |
| Share with license KBK-N            | 0.113<br>(0.007) | 0.122<br>(0.008) | 0.116<br>(0.005)  | 0.119<br>(0.005)  | 0.809                                 |
|                                     |                  | [0.392]          | [0.744]           | [0.469]           |                                       |
| Share with license KBP-5            | 0.006<br>(0.002) | 0.009<br>(0.002) | 0.011<br>(0.002)  | 0.007<br>(0.001)  | 0.124                                 |
|                                     |                  | [0.399]          | [0.048]           | [0.614]           |                                       |
| <b>Claims data</b>                  |                  |                  |                   |                   |                                       |
| Any previous claim <sup>†</sup>     | 0.152<br>(0.008) | 0.170<br>(0.009) | 0.180<br>(0.006)  | 0.182<br>(0.006)  | 0.018                                 |
|                                     |                  | [0.128]          | [0.005]           | [0.003]           |                                       |
| Any previous injury claim           | 0.078<br>(0.006) | 0.077<br>(0.006) | 0.082<br>(0.004)  | 0.085<br>(0.004)  | 0.687                                 |
|                                     |                  | [0.905]          | [0.593]           | [0.348]           |                                       |
| Any previous fatality claim         | 0.015<br>(0.003) | 0.016<br>(0.003) | 0.016<br>(0.002)  | 0.016<br>(0.002)  | 0.990                                 |
|                                     |                  | [0.767]          | [0.891]           | [0.785]           |                                       |
| Number previous claims per accident | 2.563<br>(0.211) | 1.938<br>(0.141) | 1.729<br>(0.080)  | 1.824<br>(0.096)  | 0.000                                 |
|                                     |                  | [0.015]          | [0.000]           | [0.000]           |                                       |
| Annualized accident rate            | 0.079<br>(0.005) | 0.097<br>(0.006) | 0.104<br>(0.004)  | 0.103<br>(0.004)  | 0.001                                 |
|                                     |                  | [0.013]          | [0.000]           | [0.000]           |                                       |
| <b>Attrition</b>                    |                  |                  |                   |                   |                                       |
| Phase 1 attrition rate              | 0.175<br>(0.008) | 0.229<br>(0.010) | 0.275<br>(0.007)  | 0.276<br>(0.007)  | 0.000                                 |
|                                     |                  | [0.000]          | [0.000]           | [0.000]           |                                       |
| <i>N</i>                            | 2,093            | 1,759            | 3,937             | 3,948             |                                       |

Table covers only phase 1 vehicles, including both those that were found in phase 2 and those that were not. SEs in parentheses. *P* values comparing noncontrol groups with control group in brackets.

\*Vehicle license plates are of the form KXX NNNX, where X represents a letter and N a number. KA... license plates were issued before KB... plates, and among KB... plates, KBK-N were issued before KBP-5.

<sup>†</sup>Previous claims refer to claims recorded before recruitment.

**Table S2. Balance test by message type**

| Indicator                           | Control          | Placebo          | Text             | Voice            | Crash            | Injury           | Joint orthogonality<br>( <i>P</i> value) |
|-------------------------------------|------------------|------------------|------------------|------------------|------------------|------------------|------------------------------------------|
| <b>Vehicle attributes</b>           |                  |                  |                  |                  |                  |                  |                                          |
| Share with license KA...*           | 0.583<br>(0.011) | 0.567<br>(0.012) | 0.561<br>(0.011) | 0.552<br>(0.011) | 0.572<br>(0.011) | 0.581<br>(0.011) | 0.315                                    |
|                                     |                  | [0.300]          | [0.142]          | [0.043]          | [0.477]          | [0.871]          |                                          |
| Share with license KB...            | 0.416<br>(0.011) | 0.433<br>(0.012) | 0.438<br>(0.011) | 0.447<br>(0.011) | 0.427<br>(0.011) | 0.418<br>(0.011) | 0.318                                    |
|                                     |                  | [0.303]          | [0.152]          | [0.047]          | [0.478]          | [0.925]          |                                          |
| Share with license KBK-N            | 0.113<br>(0.007) | 0.122<br>(0.008) | 0.119<br>(0.007) | 0.122<br>(0.007) | 0.122<br>(0.007) | 0.121<br>(0.007) | 0.655                                    |
|                                     |                  | [0.392]          | [0.504]          | [0.378]          | [0.586]          | [0.427]          |                                          |
| Share with license KBP-S            | 0.006<br>(0.002) | 0.009<br>(0.002) | 0.015<br>(0.003) | 0.006<br>(0.002) | 0.008<br>(0.002) | 0.009<br>(0.002) | 0.027                                    |
|                                     |                  | [0.399]          | [0.007]          | [0.768]          | [0.481]          | [0.274]          |                                          |
| <b>Claims data</b>                  |                  |                  |                  |                  |                  |                  |                                          |
| Any previous claim <sup>†</sup>     | 0.152<br>(0.008) | 0.170<br>(0.009) | 0.169<br>(0.008) | 0.178<br>(0.009) | 0.204<br>(0.009) | 0.173<br>(0.009) | 0.001                                    |
|                                     |                  | [0.128]          | [0.134]          | [0.024]          | [0.000]          | [0.070]          |                                          |
| Any previous injury claim           | 0.078<br>(0.006) | 0.077<br>(0.006) | 0.079<br>(0.006) | 0.083<br>(0.006) | 0.099<br>(0.007) | 0.074<br>(0.006) | 0.054                                    |
|                                     |                  | [0.905]          | [0.942]          | [0.579]          | [0.018]          | [0.576]          |                                          |
| Any previous fatality claim         | 0.015<br>(0.003) | 0.016<br>(0.003) | 0.011<br>(0.002) | 0.017<br>(0.003) | 0.019<br>(0.003) | 0.017<br>(0.003) | 0.446                                    |
|                                     |                  | [0.767]          | [0.207]          | [0.661]          | [0.405]          | [0.596]          |                                          |
| Number previous claims per accident | 2.563<br>(0.211) | 1.938<br>(0.141) | 1.693<br>(0.089) | 1.940<br>(0.164) | 1.755<br>(0.097) | 1.711<br>(0.142) | 0.000                                    |
|                                     |                  | [0.015]          | [0.000]          | [0.018]          | [0.000]          | [0.001]          |                                          |
| Annualized accident rate            | 0.079<br>(0.005) | 0.097<br>(0.006) | 0.093<br>(0.005) | 0.106<br>(0.006) | 0.119<br>(0.006) | 0.098<br>(0.006) | 0.000                                    |
|                                     |                  | [0.013]          | [0.037]          | [0.000]          | [0.000]          | [0.008]          |                                          |
| <b>Attrition</b>                    |                  |                  |                  |                  |                  |                  |                                          |
| Phase 1 attrition rate              | 0.175<br>(0.008) | 0.229<br>(0.010) | 0.281<br>(0.010) | 0.284<br>(0.010) | 0.290<br>(0.010) | 0.247<br>(0.010) | 0.000                                    |
|                                     |                  | [0.000]          | [0.000]          | [0.000]          | [0.000]          | [0.000]          |                                          |
| <i>N</i>                            | 2,093            | 1,759            | 1,950            | 1,998            | 1,983            | 1,954            |                                          |

Table covers only phase 1 vehicles, including both those that were found in phase 2 and those that were not. SEs in parentheses. *P* values comparing noncontrol groups with control group in brackets.

\*Vehicle license plates are of the form KXX NNNX, where X represents a letter and N a number. KA... license plates were issued before KB... plates, and among KB... plates, KBK-N were issued before KBP-S.

<sup>†</sup>Previous claims refer to claims recorded before recruitment.

**Table S3. Falsification test, claims**

| Experimental arm                        | Diff in Diff:<br>pre-post | Falsification:<br>2008-Pre | Falsification:<br>2007/8-Pre |
|-----------------------------------------|---------------------------|----------------------------|------------------------------|
| <b>Main effects</b>                     |                           |                            |                              |
| Placebo                                 | -0.014<br>(0.010)         | 0.018<br>(0.011)           | 0.017*<br>(0.009)            |
| Any treatment sticker                   | -0.017***<br>(0.008)      | 0.010<br>(0.009)           | 0.012*<br>(0.007)            |
| <b>Individual vs. collective action</b> |                           |                            |                              |
| Individual                              | -0.012<br>(0.008)         | 0.010<br>(0.010)           | 0.015*<br>(0.008)            |
| Collective action                       | -0.022***<br>(0.008)      | 0.010<br>(0.010)           | 0.010<br>(0.008)             |
| <b>Message types</b>                    |                           |                            |                              |
| Text message only                       | 0.001<br>(0.010)          | -0.003<br>(0.011)          | 0.002<br>(0.009)             |
| Supportive: Voice                       | -0.024**<br>(0.010)       | 0.017<br>(0.012)           | 0.019**<br>(0.010)           |
| Event aversion: Crash                   | -0.028***<br>(0.010)      | 0.019<br>(0.012)           | 0.023**<br>(0.010)           |
| Consequence aversion: Injury            | -0.016*<br>(0.010)        | 0.008<br>(0.012)           | 0.006<br>(0.010)             |
| Observations                            | 23,474                    | 23,474                     | 23,474                       |

The pre period is 2009/10, and the post period is 2011/13, as in Table 4, from which the first column is copied. The second column is a falsification test in which a double-difference estimation is conducted using data from 2008 and the pre period. The third column combines data from 2007 and 2008 and compares this with the pre period. All reported coefficients are on the interaction between the independent variable and the latter of the two periods considered. SEs in parentheses. Significant differences at \*10%, \*\*5%, and \*\*\*1% levels.

**Table S4. Balance test, unattributed sample**

| Indicator                             | Control          | Placebo          | Treatment        | Placebo vs.<br>control | Treatment vs.<br>control | Treatment vs.<br>placebo |
|---------------------------------------|------------------|------------------|------------------|------------------------|--------------------------|--------------------------|
| <b>Vehicle attributes</b>             |                  |                  |                  |                        |                          |                          |
| Share with license KA... <sup>†</sup> | 0.554<br>(0.012) | 0.538<br>(0.014) | 0.530<br>(0.007) | -0.016<br>(0.018)      | -0.024*<br>(0.014)       | -0.008<br>(0.015)        |
| Share with license KB...              | 0.446<br>(0.012) | 0.462<br>(0.014) | 0.469<br>(0.007) | 0.016<br>(0.018)       | 0.023*<br>(0.014)        | 0.007<br>(0.015)         |
| Share with license KBK-N              | 0.123<br>(0.008) | 0.130<br>(0.009) | 0.128<br>(0.004) | 0.006<br>(0.012)       | 0.005<br>(0.009)         | -0.002<br>(0.010)        |
| Share with license KBP-S              | 0.007<br>(0.002) | 0.008<br>(0.002) | 0.010<br>(0.001) | 0.001<br>(0.003)       | 0.003<br>(0.003)         | 0.002<br>(0.003)         |
| <b>Claims data</b>                    |                  |                  |                  |                        |                          |                          |
| Any previous claim <sup>‡</sup>       | 0.155<br>(0.009) | 0.173<br>(0.010) | 0.183<br>(0.005) | 0.018<br>(0.013)       | 0.028***<br>(0.010)      | 0.010<br>(0.012)         |
| Any previous injury claim             | 0.080<br>(0.007) | 0.078<br>(0.007) | 0.083<br>(0.004) | -0.002<br>(0.010)      | 0.003<br>(0.008)         | 0.005<br>(0.008)         |
| Any previous fatality claim           | 0.015<br>(0.003) | 0.018<br>(0.004) | 0.017<br>(0.002) | 0.003<br>(0.005)       | 0.002<br>(0.003)         | -0.002<br>(0.004)        |
| Number previous claims per accident   | 2.349<br>(0.207) | 1.913<br>(0.161) | 1.710<br>(0.066) | -0.436<br>(0.267)      | -0.639***<br>(0.168)     | -0.203<br>(0.160)        |
| Annualized accident rate              | 0.079<br>(0.005) | 0.098<br>(0.007) | 0.106<br>(0.003) | 0.018**<br>(0.008)     | 0.026***<br>(0.007)      | 0.008<br>(0.008)         |
| N                                     | 1,726            | 1,356            | 5,712            | 3,082                  | 7,438                    | 7,068                    |

Table covers only phase 1 vehicles that were found in phase 2. SEs in parentheses. Significant differences at \*10%, \*\*5%, and \*\*\*1% levels.

<sup>†</sup>Vehicle license plates are of the form KXX NNNX, where X represents a letter and N a number. KA... license plates were issued before KB... plates, and among KB... plates, KBK-N were issued before KBP-S.

<sup>‡</sup>Previous claims refer to claims recorded before recruitment.
